# Supplementary material for: Extracellular vesicles as mediators ofin vitroneutrophil swarming on a large-scale microparticle array
Source: Royal Society of Chemistry journal article supplement (doi:10.1039/c9lc00483a), 2019-01-01
Supplement: c9lc00483a2.pdf [file c9lc00483a2.pdf]

## Supplementary Information

### Supplementary Table

**Table 1.** Comparison of currently used techniques to analyze neutrophil migration

### Supplementary Figures

**Fig. S1.** Arrays of different microbial particles.

**Fig. S2.** Comparison of Different Bioparticle Array Generation Platforms.

**Fig. S3.** Quantification of EVs Released by Neutrophils of Various Donors.

**Fig. S4.** Quantification of Exosomes Released Over Time by Non-Activated Neutrophils.

**Fig. S5.** Quantification of Microvesicles Released Over the Swarming Process.

### Supplementary Videos

**Video S1.** Human neutrophil swarming on an array of *E. coli* targets.

**Video S2.** Human neutrophil swarming toward an *E. coli* target with tracks showing neutrophil migration.

**Video S3.** Human neutrophils in the presence of snEVs.

**Video S4.** Human neutrophils in the presence of nEVs.

**Video S5.** Human neutrophils with no added EVs.

**Table 1.** Comparison of currently used techniques to analyze neutrophil migration.

| <b>Technique</b>                             | <b>Publication</b> | <b>Driving Force</b>                         | <b>Possible Quantification Methods</b>                                                                  |
|----------------------------------------------|--------------------|----------------------------------------------|---------------------------------------------------------------------------------------------------------|
| <i>Boyden Chamber</i>                        | Menezes, 2008.     | fMLP gradient                                | Number of cells that passed through membrane                                                            |
| <i>Under Agarose</i>                         | Afonso, 2012.      | fMLP gradient                                | Migration analysis through tracking individual cells                                                    |
| <i>Microfluidic Devices, gradient driven</i> | Movassagh, 2017.   | fMLP gradient                                | Migration analysis through tracking individual cells                                                    |
| <i>Microfluidic Devices, spontaneous</i>     | Ellett, 2018.      | spontaneous migration                        | Migration analysis through tracking individual cells                                                    |
| <i>Swarming Platform</i>                     | Reategui, 2017.    | neutrophil generated response to bioparticle | Migration analysis through tracking individual cells<br>Collective behavior analysis (e.g., swarm size) |

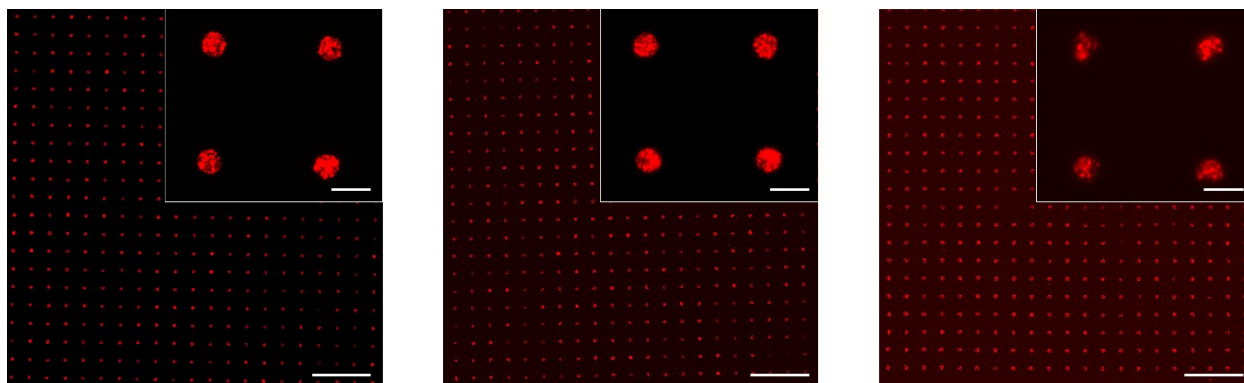

**Fig. S1. Arrays of different microbial particles.** Our platform can generate arrays of a variety of targets, including particles derived from *E. coli* **(a)**, *S. aureus* **(b)**, and *S. cerevisiae* **(c)**. (Scale bars: 500  $\mu\text{m}$  main image, 50  $\mu\text{m}$  inset).

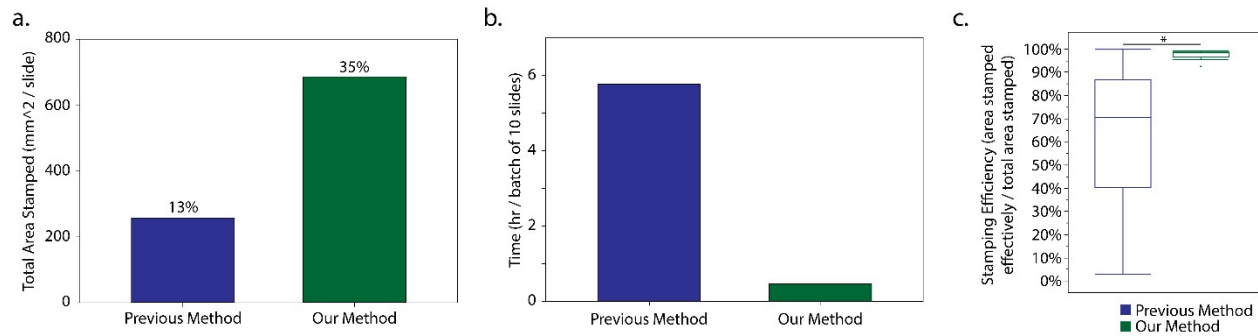

**Fig. S2. Comparison of Different Bioparticle Array Generation Platforms.** Our improved technology for generating bioparticle arrays is more efficient than the previously reported platform.<sup>3</sup> **a.** Our platform can produce a bioparticle array that covers 35% of the surface area of a glass slide while the previous platform covers 13%. (686 mm<sup>2</sup> stamped area/glass slide compared with 256 mm<sup>2</sup> stamped area/glass slide, respectively). **b.** The previous platform is more labor intensive than our platform. Our platform requires 8% of the labor of the previous platform (0.5 and 5.8 hours/batch of 10 slides, respectively). **c.** Our platform is more reliable and consistent across the array. On average, the previous platform has an efficiency of 62%  $\pm$  28%, while our platform has an efficiency of 98%  $\pm$  2%. This efficiency is calculated as the area stamped effectively divided by the total possible stamped area. (\*t-test assuming unequal variances,  $p < 0.00001$ . Previous platform  $n = 23$ . Our platform  $n = 11$ )

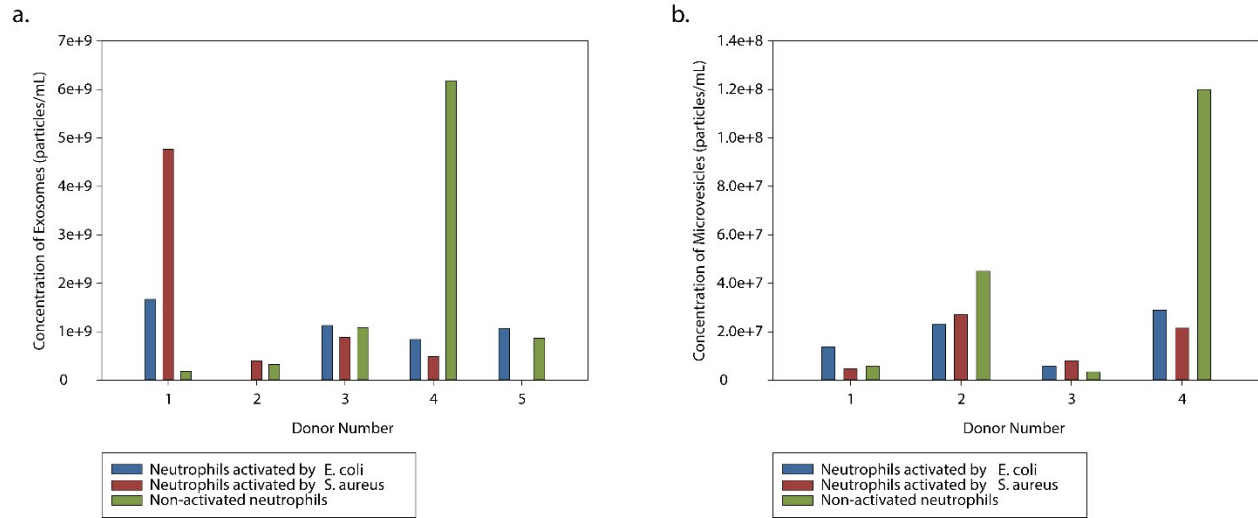

**Fig. S3. Quantification of EVs Released by Neutrophils of Various Donors.** **a.** The concentration of snEVs and nEVs in the exosome size range was determined for multiple donors when stable swarms had been produced ( $t = 90$  min). There is no statistically significant difference between the concentration of snEVs and nEVs in the exosome size range at  $t = 90$  min. (t-test,  $n = 5$ ,  $\alpha = 0.05$ ) **b.** The concentration of snEVs and nEVs in the microvesicle size range was determined for multiple donors when stable swarms had been produced ( $t = 90$  min). There is no statistically significant difference between the concentration of snEVs and nEVs in the microvesicle size range at  $t = 90$  min. (t-test,  $n = 4$ ,  $\alpha = 0.05$ )

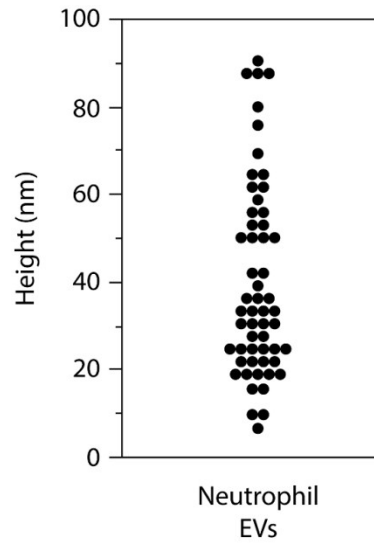

**Fig. S4. Characterization of EV Heights by AFM.** The height of the EVs on the AFM images range from 6 to 89 nm.

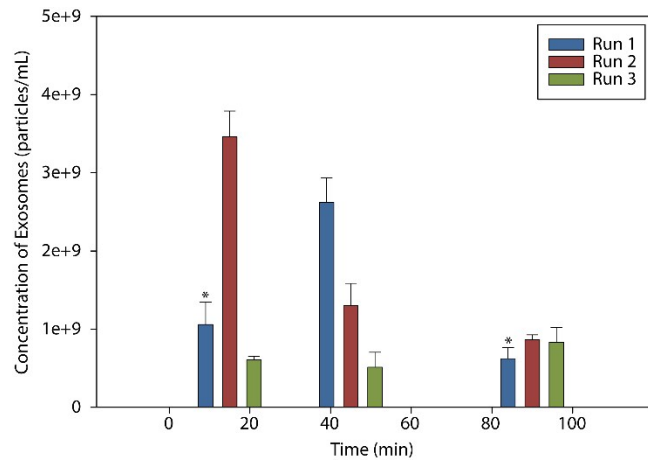

**Fig. S5. Quantification of Exosomes Released Over Time by Non-Activated Neutrophils.**

The concentration of exosomes released by non-activated neutrophils followed no clear trend over time. (\*one-sided t-test for the given time point compared to  $t = 45$  for the same run,  $n = 3$ ,  $p < 0.05$ ).

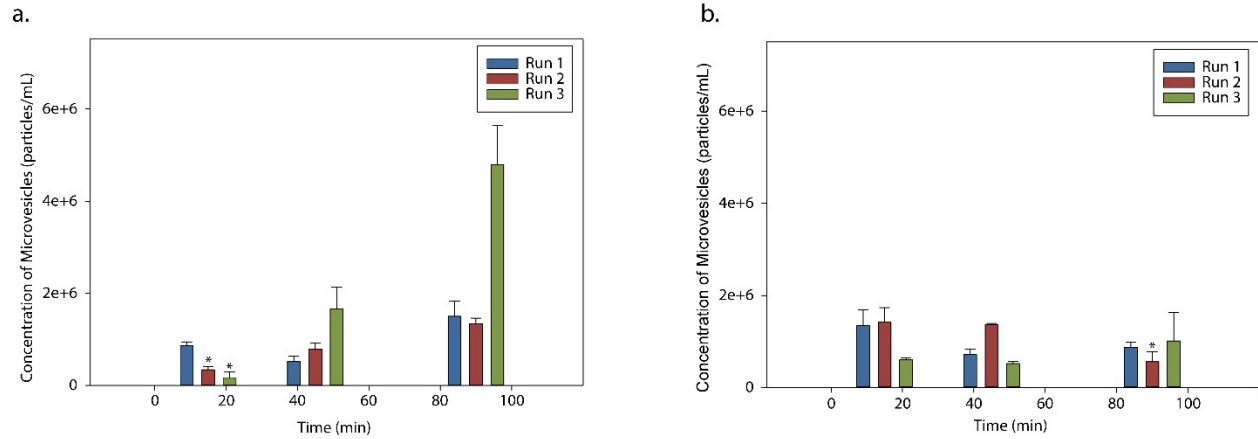

**Fig. S6. Quantification of Microvesicles Released Over Time.** The concentration of microvesicles followed no clear trend over time for both swarming (a) and non-activated (b) neutrophils. (\*one-sided t-test for the given time point compared to  $t = 45$  for the same run,  $n = 3$ ,  $p < 0.05$ ).



**Video S1.** Human neutrophil swarming on an array of *E. coli* targets. (Scale bar: 100  $\mu\text{m}$ , original acquisition time: 30 min)

**Video S2.** Human neutrophil swarming toward an *E. coli* target with tracks showing neutrophil migration. (Scale bar: 30  $\mu\text{m}$ , original acquisition time: 25 min)

**Video S3.** Human neutrophils in the presence of snEVs. (Scale bar: 50  $\mu\text{m}$ , original acquisition time: 60 min)

**Video S4.** Human neutrophils in the presence of nEVs. (Scale bar: 50  $\mu\text{m}$ , original acquisition time: 60 min)

**Video S5.** Human neutrophils with no added EVs. (Scale bar: 50  $\mu\text{m}$ , original acquisition time: 60 min)

## References

- 1 G. B. Menezes, R. M. Rezende, P. E. M. Pereira-Silva, A. Klein, D. C. Cara and J. N. Francischi, *Eur. J. Pharmacol.*, 2008, **598**, 118–122.
- 2 P. V. Afonso, M. Janka-Junttila, Y. J. Lee, C. P. McCann, C. M. Oliver, K. A. Aamer, W. Losert, M. T. Cicerone and C. A. Parent, *Dev. Cell*, 2012, **22**, 1079–1091.
- 3 H. Movassagh, A. Saati, S. Nandagopal, A. Mohammed, N. Tatari, L. Shan, J. S. Duke-cohan, K. R. Fowke, F. Lin and A. S. Gounni, *J. Immunol.*, 2017, **198**, 1023–1033.
- 4 F. Ellett, J. Jorgensen, A. L. Marand, Y. M. Liu, M. M. Martinez, V. Sein, K. L. Butler, J. Lee and D. Irimia, *Nat. Biomed. Eng.*, 2018, **2**, 207–214.
- 5 E. Reátegui, F. Jalali, A. H. Khankhel, E. Wong, H. Cho, J. Lee, C. N. Serhan, J. Dalli, H. Elliott and D. Irimia, *Nat. Biomed. Eng.*, 2017, **1**, 1–12.
